# Supplementary material for: Phenyl carbamate functionalized zinc oxide nanorods for paper-based thin film microextraction
Source: Royal Society of Chemistry journal article supplement (doi:10.1039/c7ra06061k), 2017-01-01
Supplement: c7ra06061k1.pdf [file c7ra06061k1.pdf]

## Supplementary Information

for

### **Phenyl carbamate functionalized zinc oxide nanorods for paper-based thin film microextraction**

**Mohammad Saraji\* and Narges Mehrafza**

*Department of Chemistry, Isfahan University of Technology, Isfahan 84156-83111, Iran*

\*Corresponding author: E-mail: [saraji@cc.iut.ac.ir](mailto:saraji@cc.iut.ac.ir), [msaraji@ymail.com](mailto:msaraji@ymail.com)

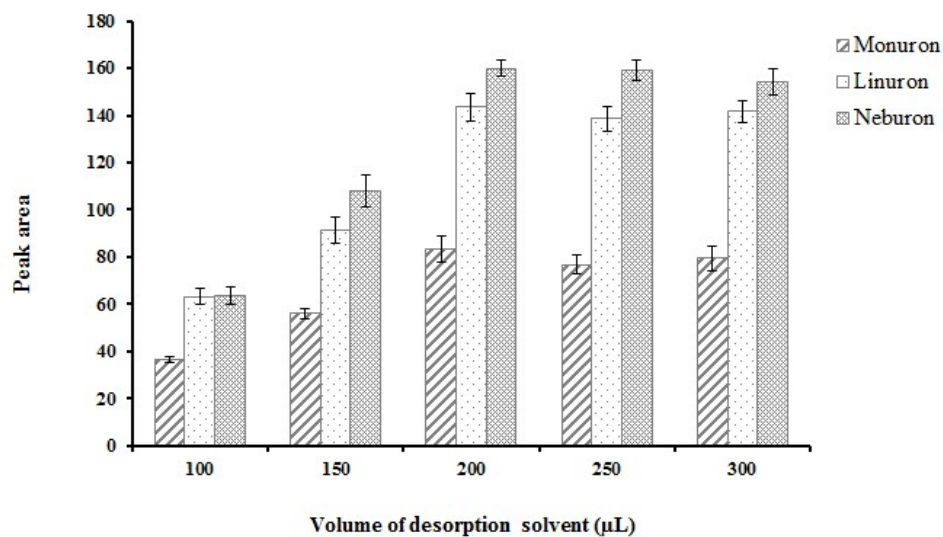

**Fig. S1** Effect of volume of desorption solvent on the extraction efficiency of phenylurea herbicides (analyte concentration:  $5 \mu\text{g L}^{-1}$ ; sample volume: 15.0 mL; shaking rate for extraction: 210 rpm; shaking rate for desorption: 210 rpm; extraction time: 15 min; desorption time: 10 min and desorption solvent: 2-propanol).

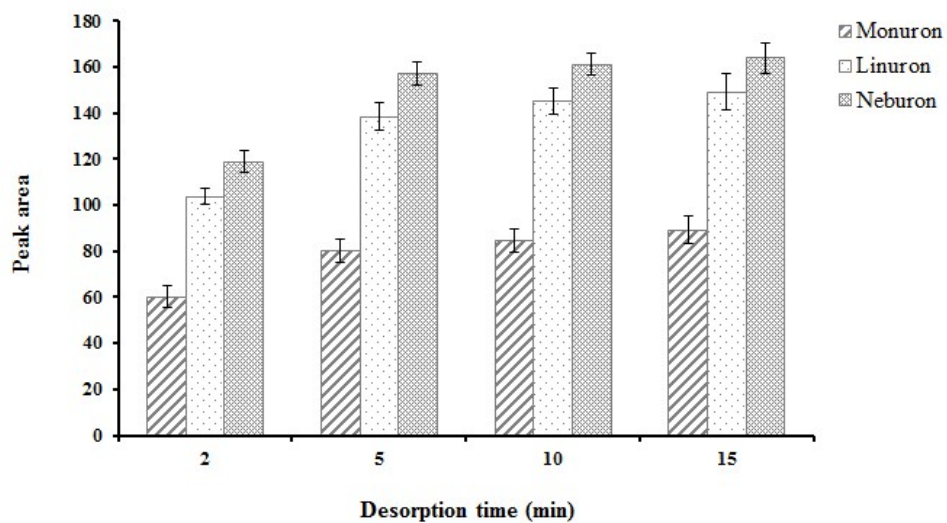

**Fig. S2** Effect of desorption time on the extraction efficiency of phenylurea herbicides (analyte concentration:  $5 \mu\text{g L}^{-1}$ ; sample volume: 15.0 mL; shaking rate for extraction: 210 rpm; shaking rate for desorption: 210 rpm; extraction time: 15 min; volume of desorption solvent: 200  $\mu\text{L}$  and desorption solvent: 2-propanol).
